# Supplementary material for: Bipyridyl ligands as photoactivatable mono- and bis-alkylating agents capable of DNA cross-linking
Source: Royal Society of Chemistry journal article supplement (doi:10.1039/b616292d), 2006-11-16
Supplement: b616292d.pdf [file b616292d.pdf]

## *Electronic Supplementary Information*

### **Bipyridyl Ligands as Photoactivatable Mono- and Bis-Alkylating Agents Capable of DNA Cross-Linking.**

*Daniela Verga,<sup>a</sup> Sara N. Richter,<sup>b</sup> Manlio Palumbo,<sup>b</sup> Remo Gandolfi,<sup>a</sup> Mauro Freccero<sup>a\*</sup>*

<sup>a</sup>Dipartimento di Chimica Organica, Università di Pavia, V.le Taramelli 10, 27100 Pavia, Italy;

<sup>b</sup>Dipartimento di Scienze Farmaceutiche, Università di Padova, Via Marzolo 5, 35131 Padova, Italy.

mauro.freccero@unipv.it.

**General Procedures.** The [2,2']bipyridinyl-5,5'-diol, has been prepared according to published procedures.<sup>1</sup> The other reagents (of commercial origin) were distilled or re-crystallized before use. For the irradiations, spectroscopic grade solvents were used as received. Before irradiation all the solutions were purged with argon for 5 minutes. For the preparative irradiations a merry go-round reactor supporting four 15w lamps was used.

<sup>1</sup>H and <sup>13</sup>C NMR spectra were recorded with a 300 MHz spectrometer, and the chemical shifts are reported relative to TMS. The structures of the new compounds were deduced from the results of <sup>1</sup>H, <sup>13</sup>C, and DEPT-135, when carbon type assignments were included. Reverse preparative column chromatography was conducted on LiChroprep RP-18 (40-63 μm), eluent H<sub>2</sub>O : MeOH 7:3 + TFA 1%. Reaction products were also separated and quantified analytically by reverse-phase (Intersil ODS-2, 5 μm, column dimension : φ = 4.6 mm, length = 250 mm, φ = 10.0 mm, length = 250 mm, Micro-Column) HPLC chromatography using a variable-wavelength detector.

**6,6'-Bis-dimethylaminomethyl-[2,2']bipyridinyl-5,5'-diol (5).** N,N-dimethylmethyleiminium chloride (130 mg, 1.39 mmol) and K<sub>2</sub>CO<sub>3</sub> (47 mg, 0.35 mmol) were added to a solution of [2,2']bipyridinyl-5,5'-diol (87 mg, 0.46 mmol), in anhydrous CH<sub>2</sub>Cl<sub>2</sub> (2.5 ml). The resulting suspension was heated to reflux under nitrogen for 6 hrs. The solution was filtered off and the solid was treated twice with methanol (10 ml). After filtration, evaporation of the solvent gave 133 mg (0.44 mmol, yield 96%) of **5** as colourless crystals. Mp > 216°C (dec.). <sup>1</sup>H-NMR (CD<sub>3</sub>OD): δ 3.07 (s, 12 H), 4.57 (s, 4 H), 7.43 (d, 2 H, J = 8.7 Hz), 8.46 (d, 2 H, J = 8.7 Hz). <sup>13</sup>C-NMR (CD<sub>3</sub>OD): 44.6 (CH<sub>3</sub>), 58.5 (CH<sub>2</sub>), 123.7 (CH), 125.1 (CH), 138.2 (C), 148.6 (C), 153.8 (C).

**Photochemical Reactions in methanol.** Irradiations have been carried out on 100 ml solution of **5** (10<sup>-3</sup> M) in methanol in the absence and in the presence of morpholine and L-amino esters (5x10<sup>-2</sup> M), dividing the solution in 10 ml Pyrex tubes. In more detail, a solution of amine **5** with no nucleophiles, and in presence of morpholine, L-proline methyl or *t*-butyl esters were capped after being flushed with argon for 5 min and externally irradiated by means of four 15 W phosphor-coated lamps (center of emission 310 nm) for 60 min in a merry-go-round apparatus, affording the corresponding adducts **6**, **7**, **9** and **10** in almost quantitative yield. The irradiated solutions were evaporated under reduced pressure and the products **6**, **7**, **9** and **10** were purified by reverse preparative column chromatography [LiChroprep RP-18 (40-63µm), eluent H<sub>2</sub>O : MeOH 7:3 + TFA 1%]. After chromatography trifluoroacetate anion exchange by HCl 0.1M (2 ml) addition gave the adducts **7**, and **9** as chloride salts.

**6,6'-Bis-methoxymethyl-[2,2']bipyridinyl-5,5'-diol (6).** Pale yellow crystals. Mp 124-126°C. <sup>1</sup>H-NMR (CD<sub>3</sub>OD): δ 3.65 (s, 6 H), 4.85 (s, 4 H), 7.68 (d, 2 H, J = 8.5 Hz), 8.25 (d, 2 H, J = 8.5 Hz). <sup>13</sup>C-NMR (CD<sub>3</sub>OD): 60.0 (CH<sub>3</sub>), 69.3 (CH<sub>2</sub>), 123.6 (CH), 128.9 (CH), 139.5 (C), 144.9 (C), 155.4 (C).

**6,6'-Bis-morpholin-4-ylmethyl-[2,2']bipyridinyl-5,5'-diol (7) 2HCl.** Pale yellow crystals. Mp > 176°C (dec.). <sup>1</sup>H-NMR (D<sub>2</sub>O): δ 3.46 (m, 4 H), 3.96 (m, 4 H), 4.62 (s, 4 H), 7.58 (d, 2 H, J = 8.8 Hz), 8.12 (d, 2 H, J = 8.8 Hz). <sup>13</sup>C-NMR (CD<sub>3</sub>OD): 52.0 (CH<sub>2</sub>), 55.4 (CH<sub>2</sub>), 63.5 (CH<sub>2</sub>), 124.0 (CH), 126.3 (CH), 135.2 (C), 145.3 (C), 153.0 (C).

**6,6'-Bis-L-prolineOMe-4-ylmethyl-[2,2']bipyridinyl-5,5'-diol (9) 2HCl.** Pale yellow crystals. Mp > 194°C (dec.). <sup>1</sup>H-NMR (CD<sub>3</sub>OD): δ 2.21-2.42 (m, 4 H), 2.60 (m, 2 H), 2.92 (m, 2 H), 3.50 (m, 2 H), 3.79 (m, 2 H), 3.87 (s, 6H), 4.55 (m, 2 H), 4.72 (AB system, 4H), 7.38 (d, 2 H, J = 8.7 Hz), 8.36 (d, 2 H, J = 8.7 Hz). <sup>13</sup>C-NMR (CD<sub>3</sub>OD): δ 24.1, 29.8, 52.0, 57.4, 58.8, 68.7, 124.0, 125.2, 138.3, 148.5, 154.2, 169.4.

**6,6'-Bis-L-prolineOtBu-4-ylmethyl-[2,2']bipyridinyl-5,5'-diol (10) 2CF<sub>3</sub>COOH.** Pale yellow crystals. Mp > 189°C (dec.). <sup>1</sup>H-NMR (CD<sub>3</sub>OD): δ 1.42 (s, 18 H) 2.00-2.32 (m, 6 H), 2.60 (m, 2 H), 3.50 (m, 2 H), 3.93 (m, 2 H), 4.50 (m, 2 H), 4.68 (AB system, 4H), 7.38 (d, 2 H, J = 8.7 Hz), 8.36 (d, 2 H, J = 8.7 Hz). <sup>13</sup>C-NMR (CD<sub>3</sub>OD): δ 24.1, 28.4, 29.9, 56.0, 57.4, 68.7, 86.2, 119.3 (*q*, CF<sub>3</sub>COO), 124.0, 125.2, 138.3, 148.5, 154.2, 161.8 (*q*, CF<sub>3</sub>COO), 169.4.

**Photochemical Reactions in water.** The typical procedure for the photochemical reaction 6,6'-bis-dimethylaminomethyl-[2,2']bipyridinyl-5,5'-diol (**5**) in aqueous solution with morpholine, glycine, and L-proline is as follows.

Glycine (0.751 g, 10 mmol) and **5** (40 mg, 0.132 mmol) were dissolved in 100 ml of phosphate buffered solution (pH 8). The solution was poured into 10 Pyrex tubes, flushed with argon for 5 min, and then externally irradiated by means of four 15 W phosphor-coated lamps (center of emission 310 nm) for 1.5-3 hrs in a merry-go-round apparatus. After this time the solution was evaporated under vacuum. Column chromatography (LiChroprep RP-18 (40-63 μm), eluent H<sub>2</sub>O : MeOH 8:2 TFA 1%) of the crude and trifluoroacetate exchange by chloride anion, as described above gave the adduct **8** as hydrochloride salt (39 mg, 0.090 mmol, 68% yield).

**{{6'-[(Carboxymethyl-amino)-methyl]-5,5'-dihydroxy-[2,2']bipyridinyl-6-ylmethyl}-amino)-acetic acid (8) 2HCl.** Pale yellow crystals. Mp > 136°C (dec.) <sup>1</sup>H-NMR (CD<sub>3</sub>OD): δ 3.93 (s, 4 H), 4.57 (s, 4 H), 7.61 (d, 2 H, J = 8.5 Hz), 8.11 (d, 2 H, J = 8.5 Hz). <sup>13</sup>C-NMR (CD<sub>3</sub>OD): 45.2, 47.9, 123.6, 127.1, 136.3, 142.0, 152.9, 169.8.

**6,6'-Bis-L-proline-4-ylmethyl-[2,2']bipyridinyl-5,5'-diol (11) 2HCl.** **11** has been identified by

comparison with an authentic sample obtained by deprotection of the *t*But-ester **10** according the following procedure:

**10** as bis-trifluoroacetate salt (24 mg, 0.030 mmol) has been dissolved into 0.5 ml of a TFA:CH<sub>2</sub>Cl<sub>2</sub>:Et<sub>3</sub>SiH=1:2.5:0.2 solution and stirred at r.t. for 30 min. The solution was evaporated under reduced pressure and HCl 0.1M (2 ml) was added to the residue. After solvent evaporation **11** (15 mg, 0.029 mmol, 97% yield) was recovered as chloride salts.

Pale yellow crystals. Mp > 184°C (dec.). <sup>1</sup>H-NMR (CD<sub>3</sub>OD): δ 2.16-2.32 (m, 6 H), 2.64 (m, 2 H), 3.56 (m, 2 H), 4.00 (m, 2 H), 4.59 (m, 2 H), 4.86 (s, 4H), 7.58 (d, 2 H, J = 8.5 Hz), 8.39 (d, 2 H, J = 8.5 Hz). <sup>13</sup>C-NMR (CD<sub>3</sub>OD): δ 24.1, 29.9, 55.5, 57.4, 61.1, 68.7, 124.4, 126.2, 138.0, 146.5, 154.5, 171.7.

**6-N3-deoxycytidinyl-6'-dimethylaminomethyl-1-ylmethyl-[2,2']bipyridinyl-5,5'-diol (12) 2HCl.**

Deoxycytidine monohydrate (0.981 g, 4 mmoli) and **5** (45 mg, 0.150 mmoli) were dissolved in 100 ml of phosphate buffered solution (pH 7.5), and then purged with nitrogen (after poring into 10 Pyrex tubes), and irradiated for 3 hrs. After this time the solution was evaporated under vacuum. Column chromatography (LiChroprep RP-18 (40-63µm), eluent H<sub>2</sub>O : MeOH 7:3 TFA 1%) of the crude and trifluoroacetate anion exchange by HCl 0.1M addition gave the adduct **12** as hydrochloride salt (9 mg, 0.016 mmol, 11% yield). Pale yellow solid. Mp > 198°C (dec.). <sup>1</sup>H-NMR (D<sub>2</sub>O): δ 2.31 (m, 1H), 2.38 (m, 1H), 2.92 (s, 6H), 3.63-3.85 (m, 2H), 4.01 (m, 1H), 4.38 (m, 1H), 4.48 (s, 2 H), 5.42 (s, 2H), 6.12 (t, J = 6.5 Hz, 1H), 6.35 (d, J = 7.9 Hz, 1H), 7.40 (d, J = 8.7 Hz, 1H), 7.63 (d, J = 8.7 Hz, 1H), 7.85 (d, J = 8.7 Hz, 1H), 8.10 (d, J = 8.7 Hz, 1H), 8.15 (d, J = 7.9 Hz, 1H).

**DNA cross-linking experiments.** Plasmid pBR322 (0.5 µg/sample) was mixed with increasing amounts (2.5, 5, 10, 20, 40, 80 µM) of compounds **5** and **11**, in phosphate buffer (50 mM, pH 7.5). A saturated water solution of 4,5',8-trimethylpsoralen was used to get a 0.5 nM concentration of drug in the control samples. Reaction mixtures were irradiated at 320 nm for 5 min at 120 W at room temperature. Irradiated solutions were added of alkaline agarose gel loading buffer (50 mM NaOH, 1

mM EDTA, 3% Ficoll, 0.02% bromophenol blue) and loaded on a 1% alkaline agarose gel containing 50 mM NaOH and 1 mM EDTA. Gels were run in 50 mM NaOH and 1 mM EDTA at 100 mA for 18 h and stained with ethidium bromide (0.5 µg/mL) for 30 min and subsequently washed in water for 10 min. Stained gels were visualized in Gel-Doc 1000 (Bio-Rad, Italy) and DNA bands were quantified by Quantity One software (Bio-Rad).

## Reference

- 1) Y. Fukuda, S. Seto, H. Furuta, H. Ebisu, Y. Oomori, S. Terashima *J. Med. Chem.* **2001**, *44*, 1396.
